# Supplementary material for: Synthesis and Biological Study of New Cu(II) and Au(III) Com-Plexes of 2,4-Dithiouracil and Its Derivatives
Source: Preprints.org preprint supplement (doi:10.20944/preprints202407.0929.v1), 2024-07-12
Supplement: Supplementary file 1 [file supplementary]

Supplementary file

Petya Marinova1,*, Dimitar Stoitsov2, Nikola Burdzhiev3, Slava Tsoneva2, Denica Blazheva4, Aleksandar Slavchev4, Evelina Varbanova2 and Plamen Penchev2

1 Department of General and Inorganic Chemistry with Methodology of Chemistry Education, Faculty of Chemistry, “Tzar Assen” str. 24, Plovdiv 4000, Bulgaria, E-mail: [marinova@uni-plovdiv.bg](mailto:marinova@uni-plovdiv.bg) (P.M.)

2 Department of Analytical Chemistry and Computer Chemistry, Faculty of Chemistry, University of Plovdiv, “Tzar Asen” str., 24 Plovdiv 4000, Bulgaria, E-mail: [stoitsov@uni-plovdiv.bg](mailto:stoitsov@uni-plovdiv.bg) (D.S.); [slava.tsoneva@uni-plovdiv.bg](mailto:slava.tsoneva@uni-plovdiv.bg); (S.T.); evarbanova@uni-plovdiv.bg (E.V.); [plamennpenchev@gmail.com](mailto:plamennpenchev@gmail.com) (P.P.)

3 Department of Organic Chemistry and Pharmacognosy, Faculty of Chemistry and Pharmacy, University of Sofia, 1, J. Bourchier Av., 1164 Sofia, Bulgaria, E-mail: nburdzhiev@chem.uni-sofia.bg (N.B.)

4 Department of Microbiology, University of Food Technologies, 26 Maritza Blvd., 4002 Plovdiv, Bulgaria, E-mail: [d_blazheva@uft-plovdiv.bg](mailto:d_blazheva@uft-plovdiv.bg) (D.B.); [a_slavchev@uft-plovdiv.bg](mailto:a_slavchev@uft-plovdiv.bg) (A.S.)

*Correspondence: marinova@uni-plovdiv.bg; [petia_marinova@abv.bg](mailto:petia_marinova@abv.bg) (P.M.)

1. NMR solution spectra of 2,4-dithiouracil


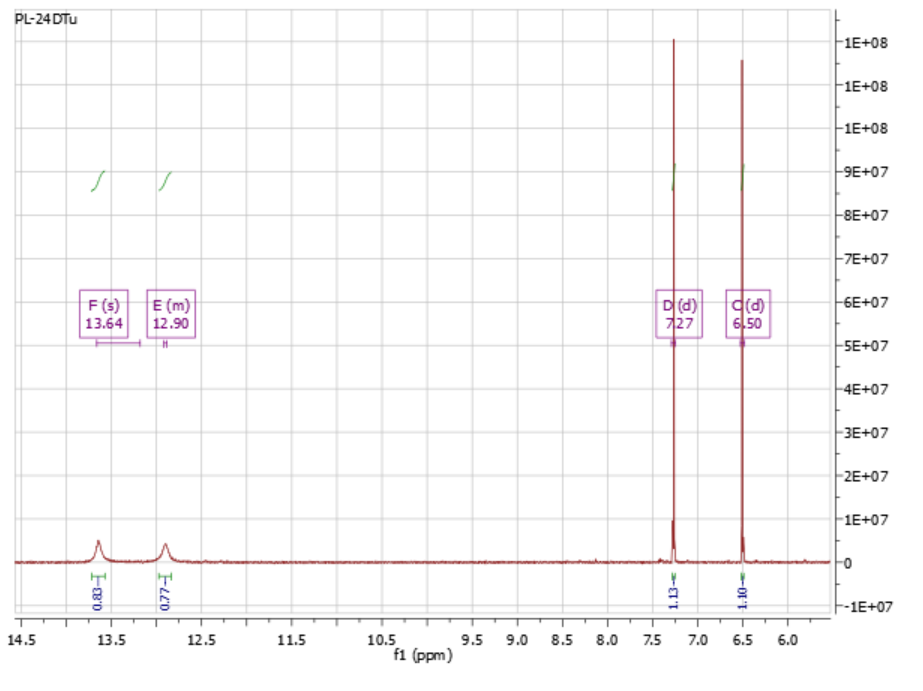


Fig. S1 1H NMR


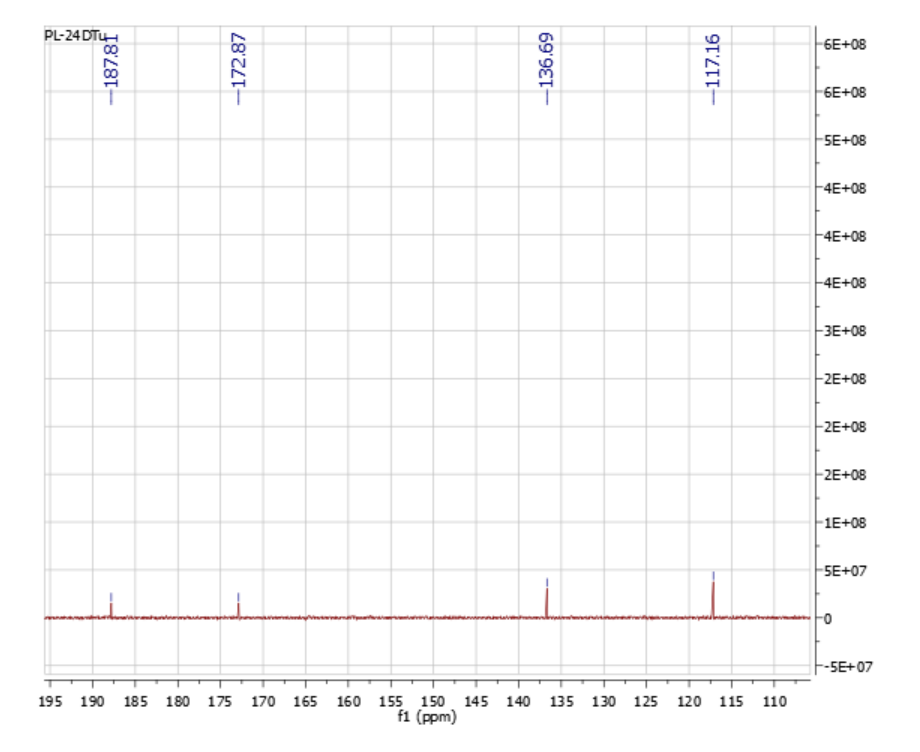


Fig.S2 13C NMR


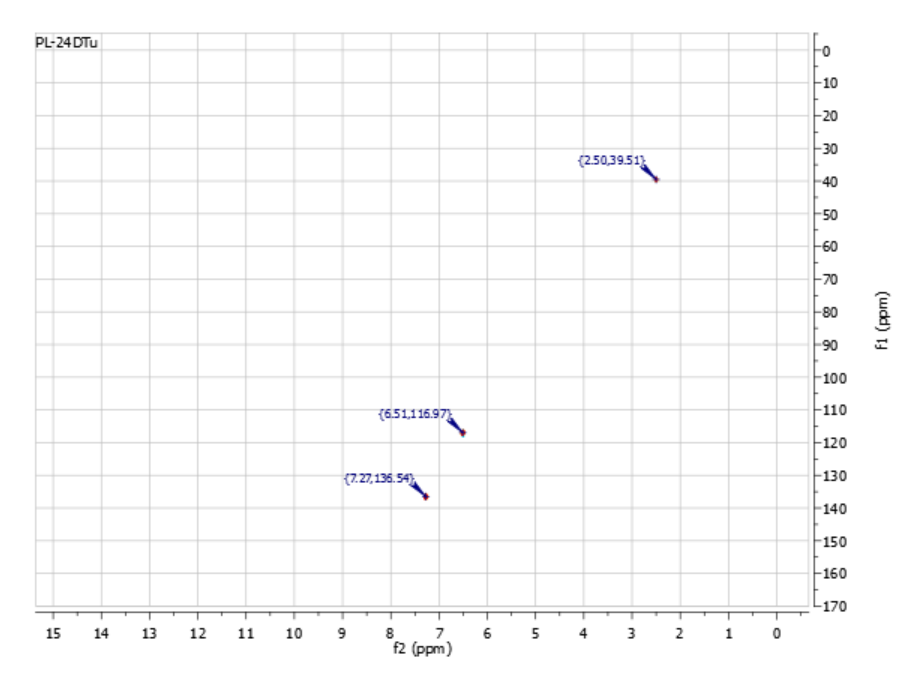


Fig. S3 HSQC


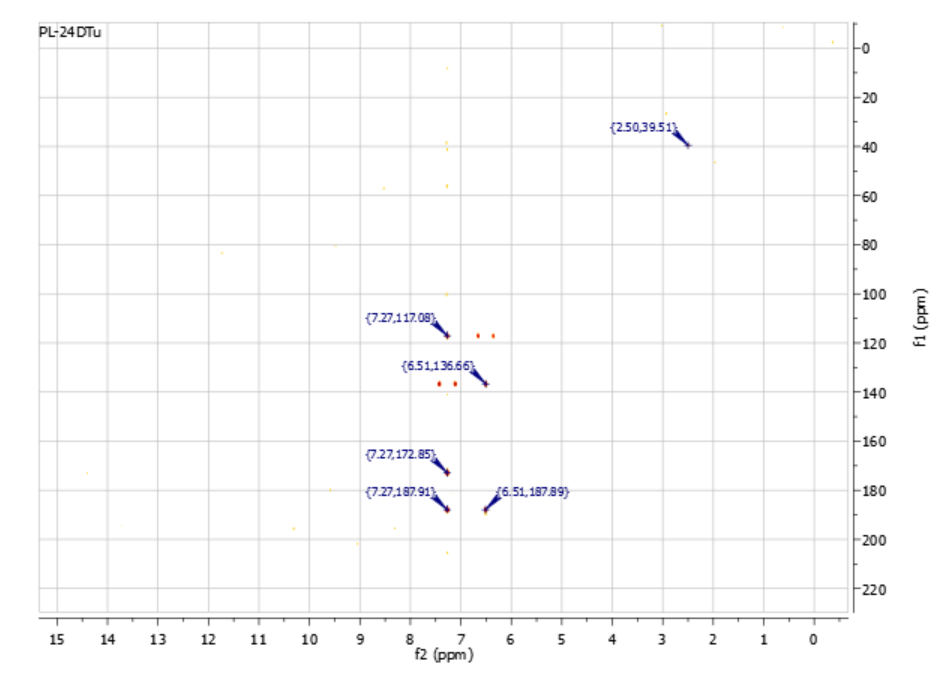


Fig. S4 HMBC


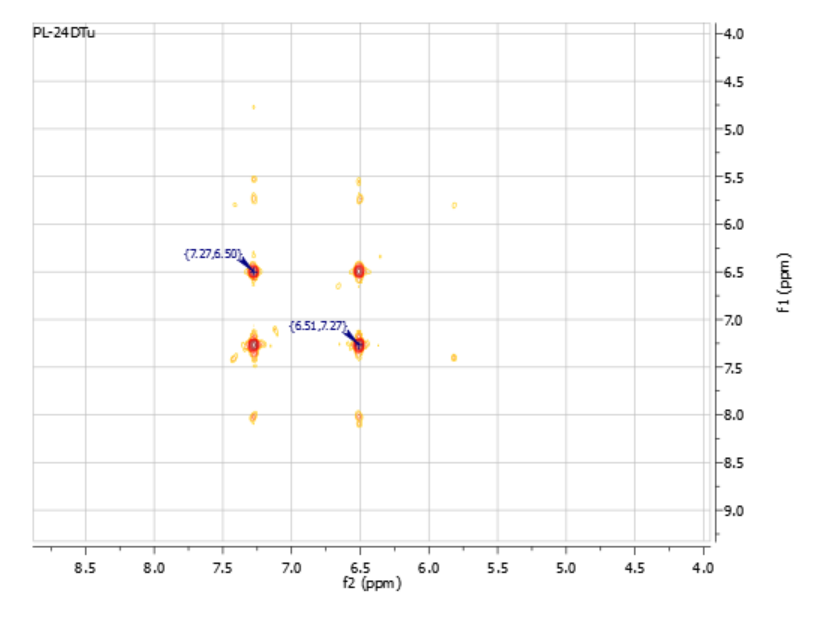


Fig. S5 1H-1H COSY

1. NMR solution spectra of the Au and Cu complexes


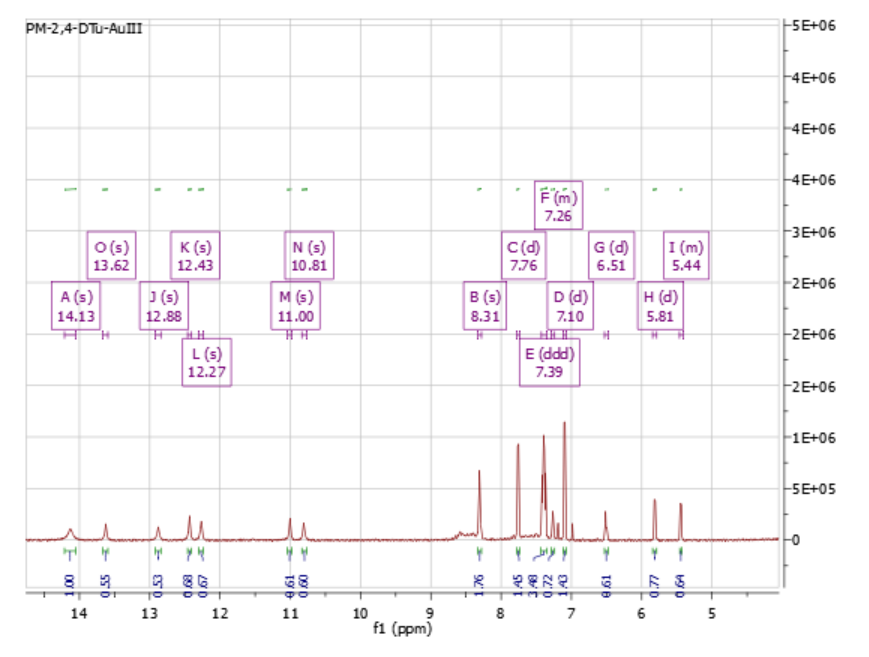


Fig.S6 1H NMR of the Au complex


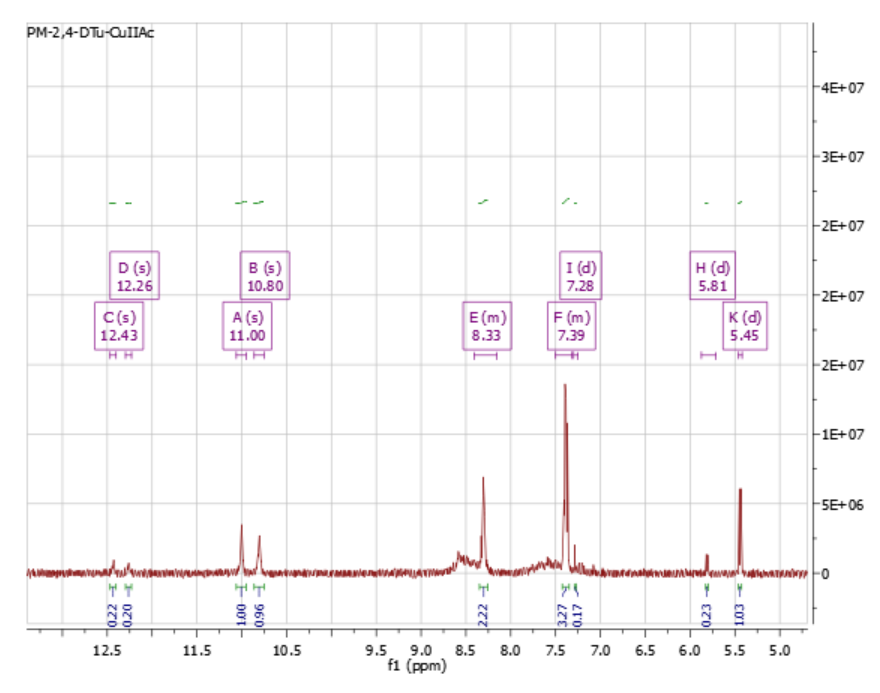


Fig. S7 1H NMR of the Cu complex


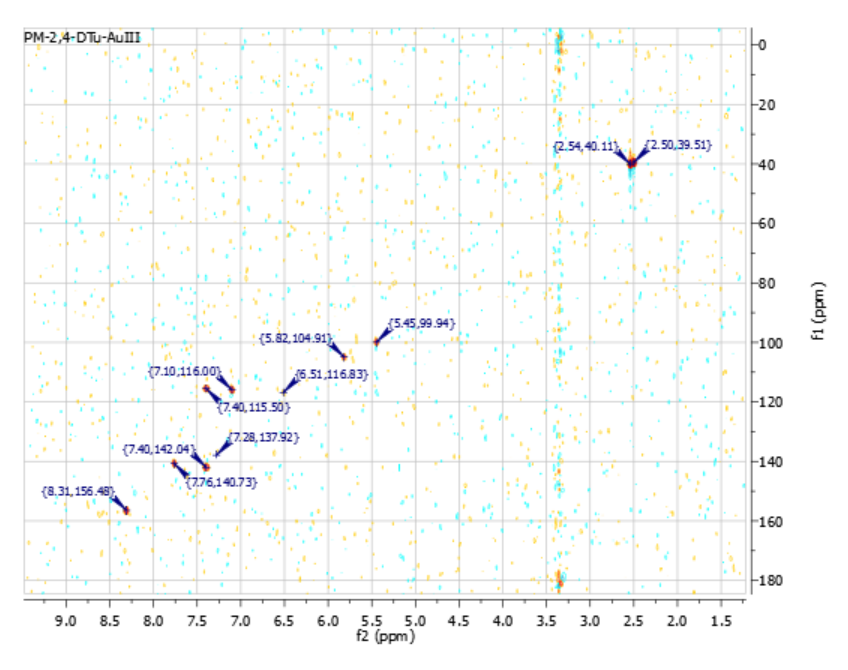


Fig.S8 HSQC of the Au complex


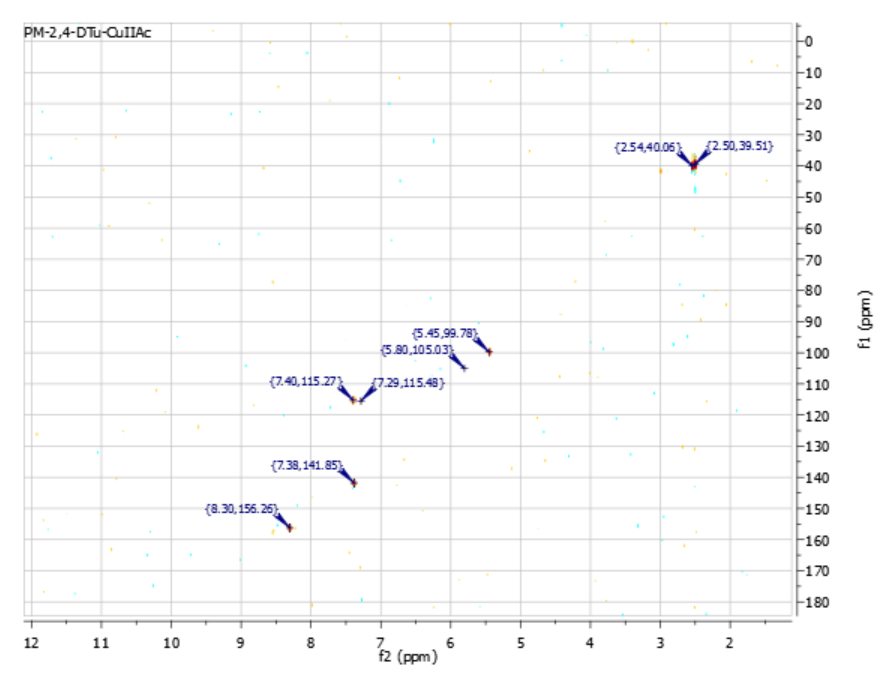


Fig.S9 HSQC of the Cu complex

1. ATR and Raman spectra


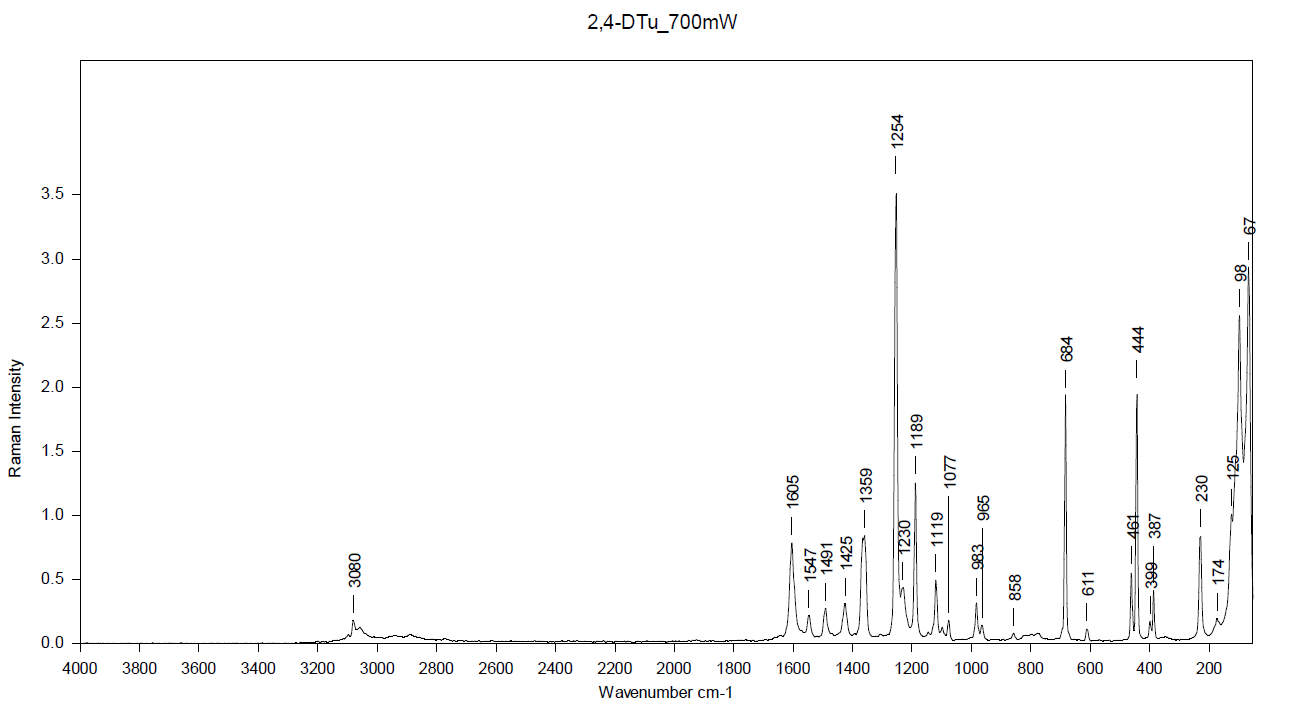


Fig.S10 Raman of 2,4-dithiouracil


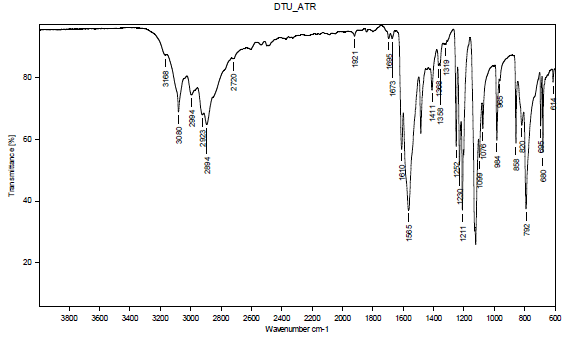


Fig.S11 ATR of 2,4-dithiouracil


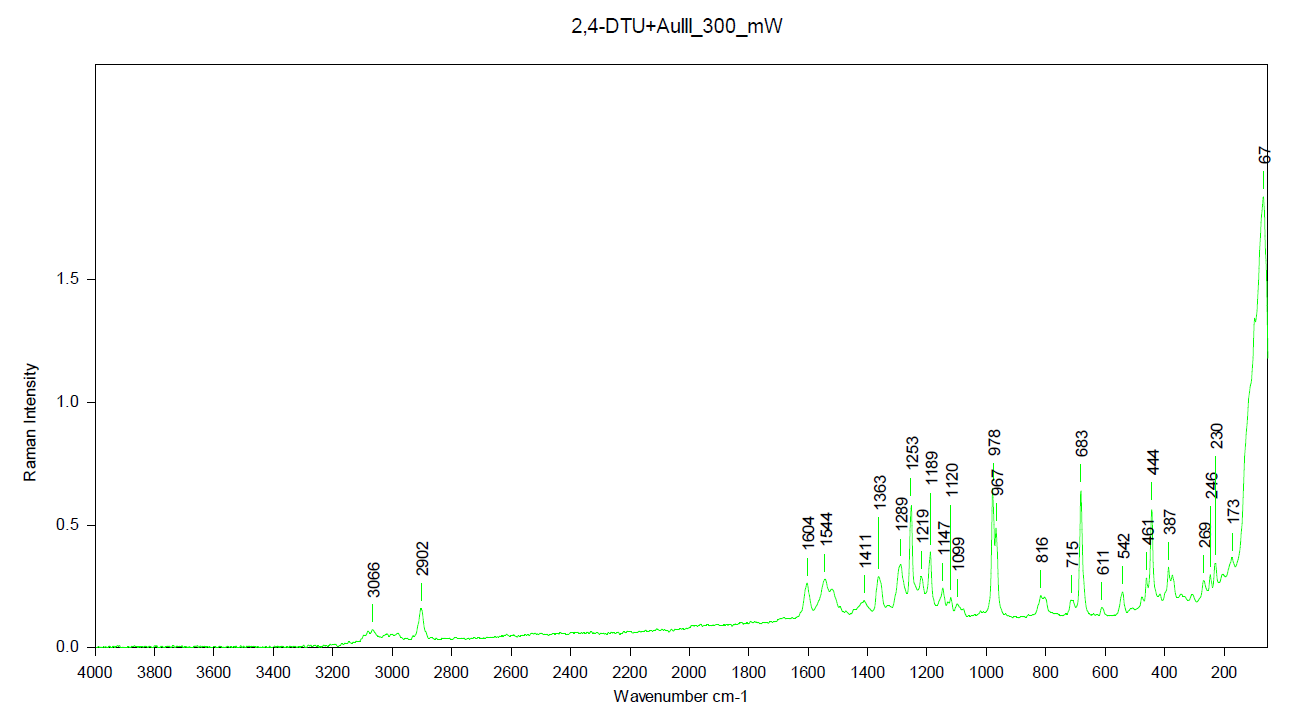


Fig. S12 Raman of the Au complex


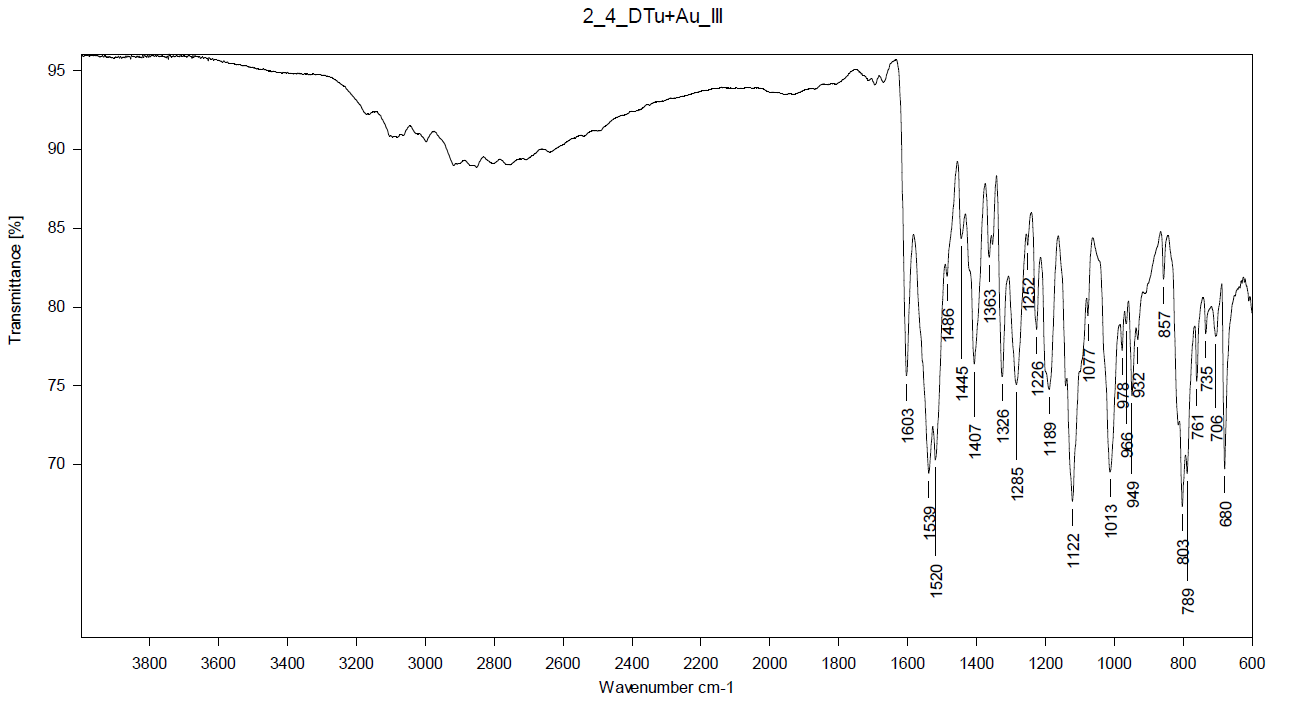


Fig. S13 ATR of the Au complex


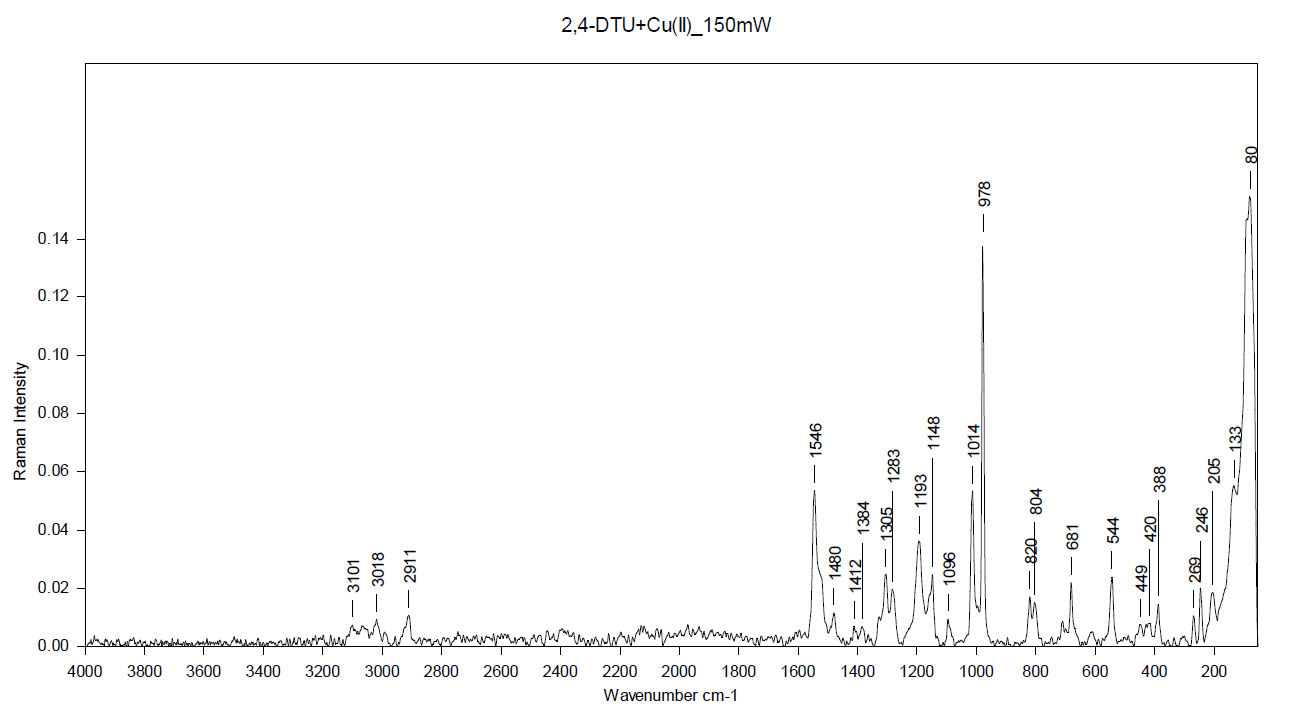


Fig. S14 Raman of the Cu complex


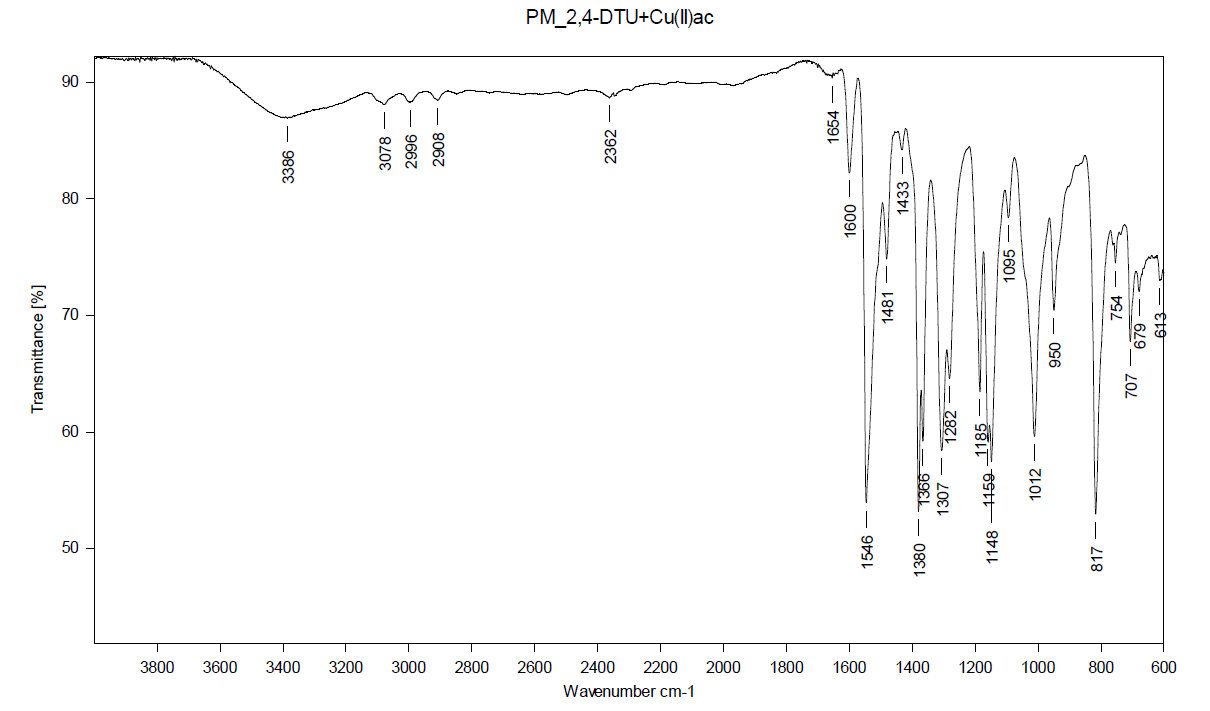


Fig. S15 ATR of the Cu complex

1. **NMR** **solid state spectra of the complexes**


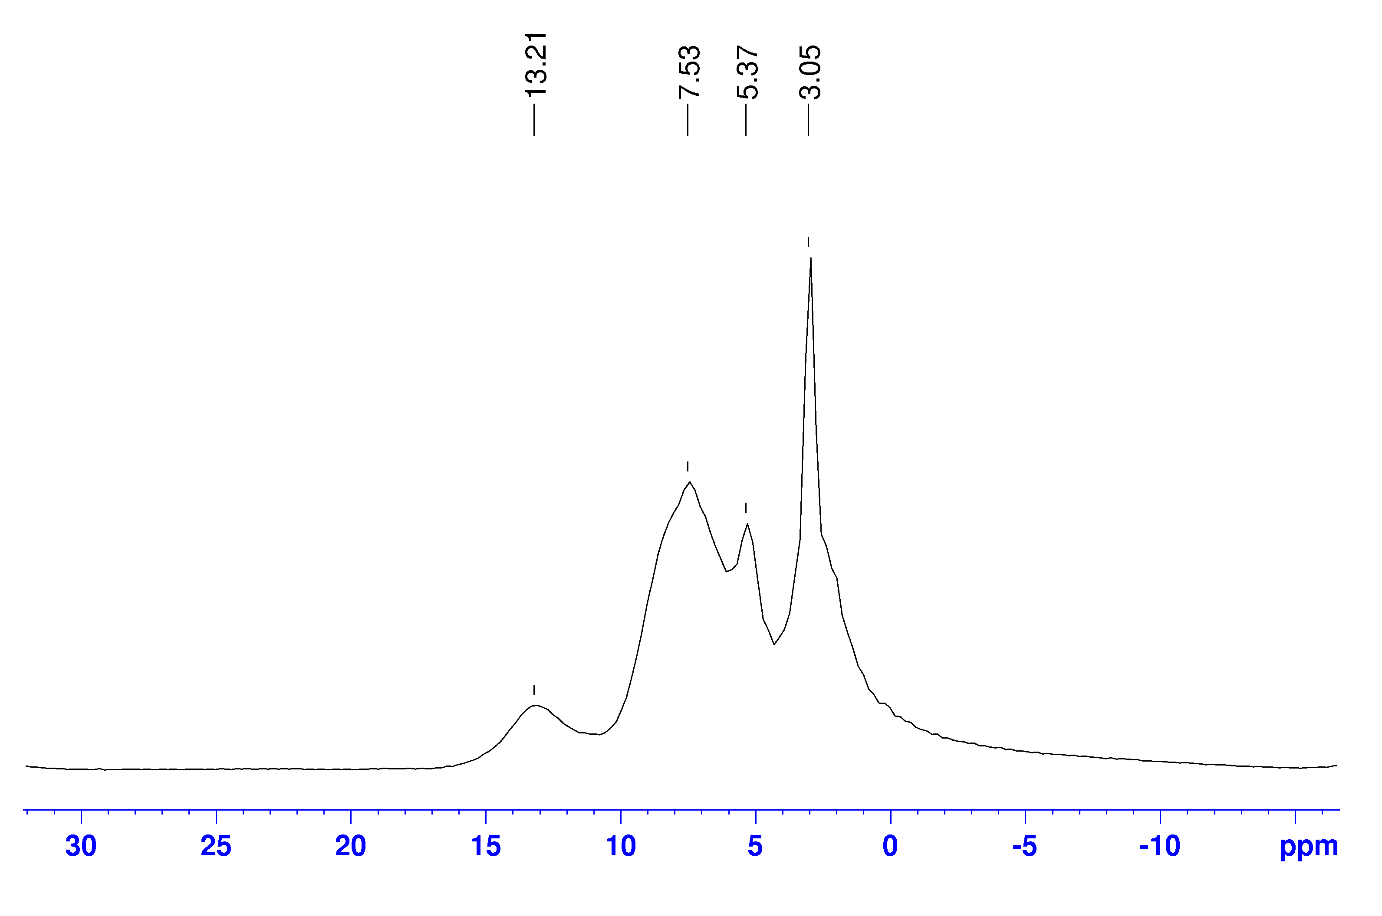


*Fig.S16 1H solid state NMR of Au complex*

*
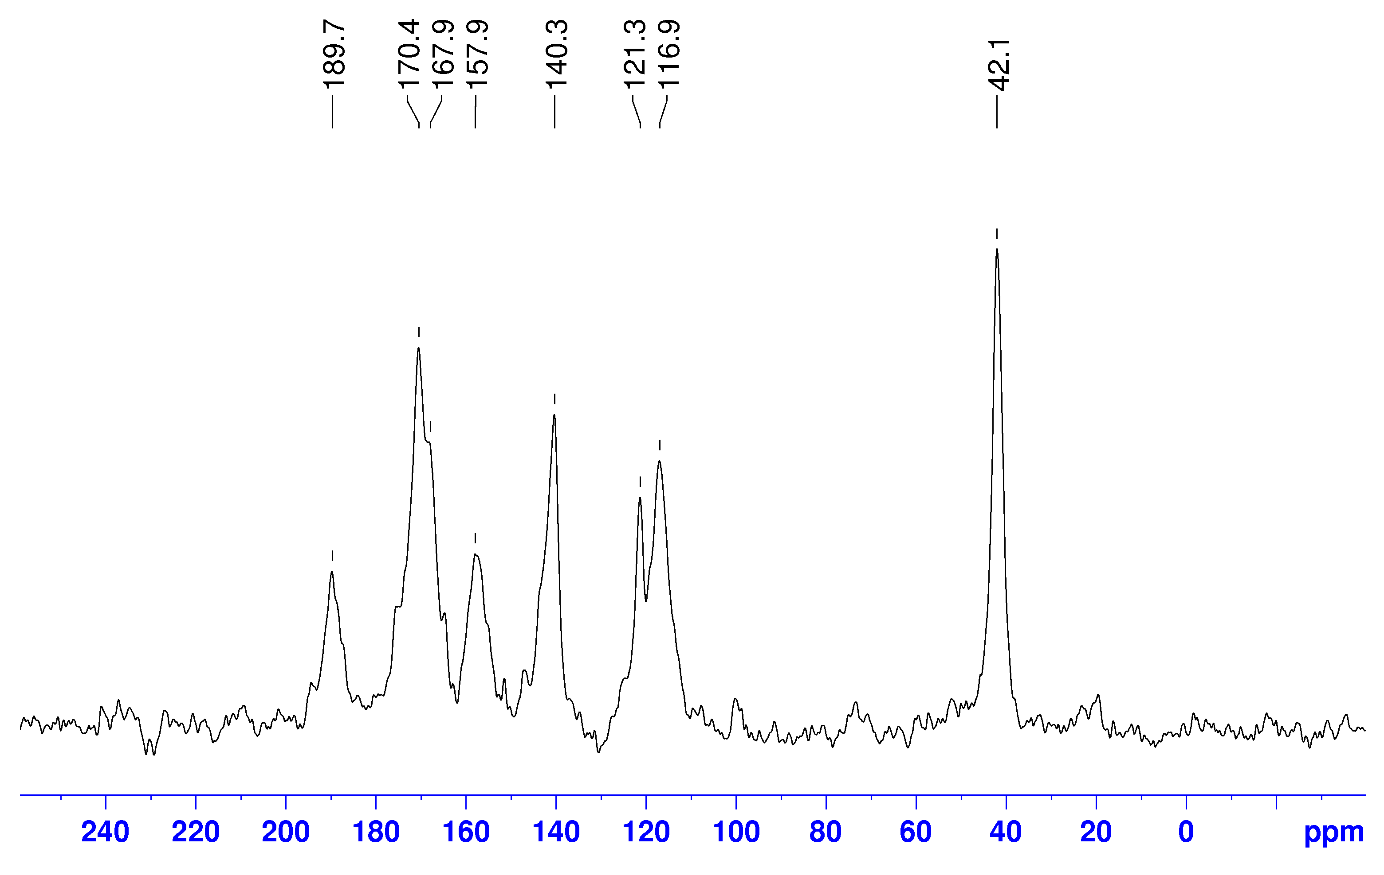
 Fig.S17 13C CP MAS NMR of Au complex*

*
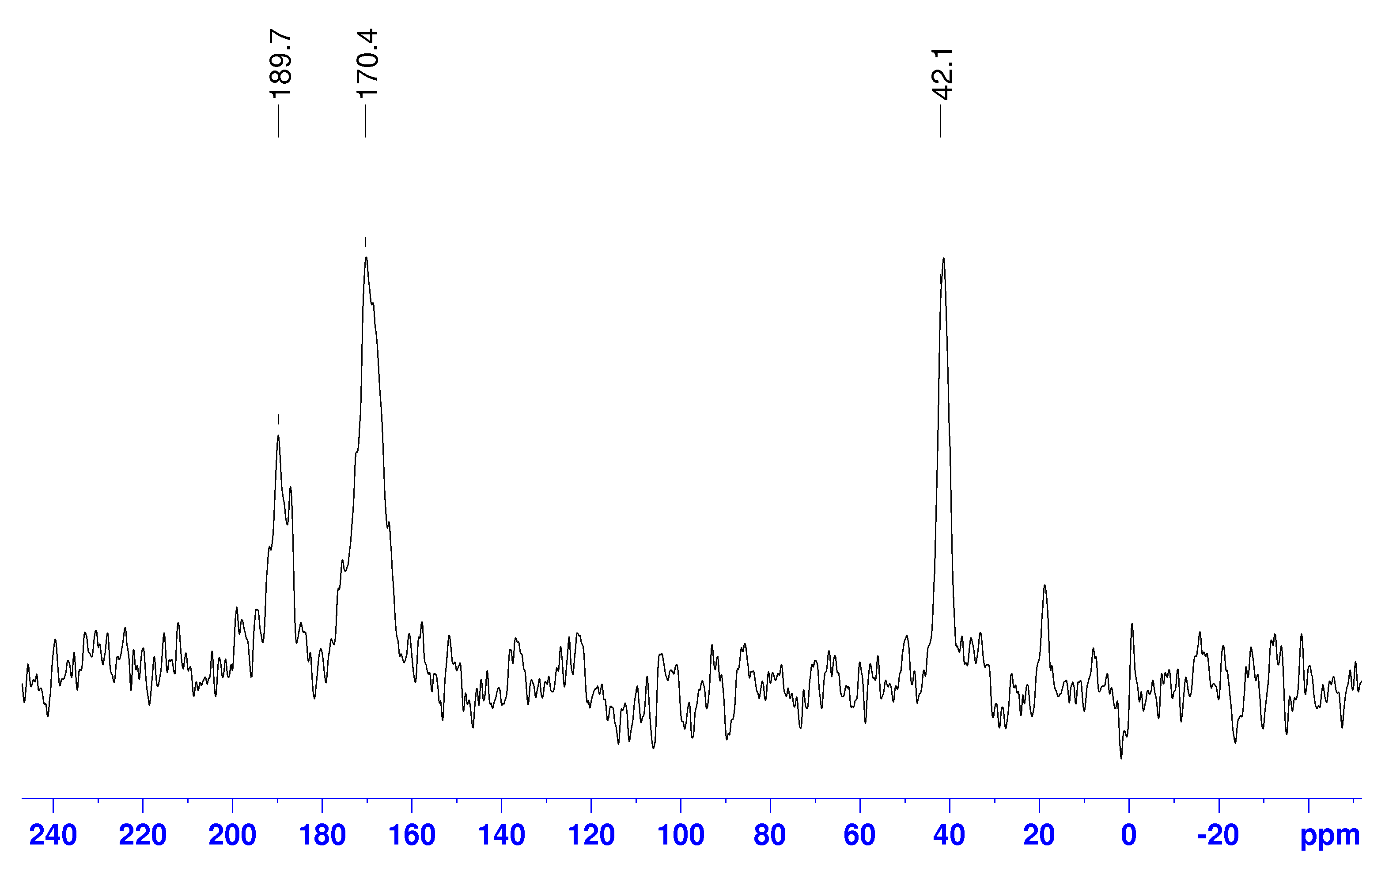
*

*Fig.S1813C CPPI MAS NMR of Au complex*

*
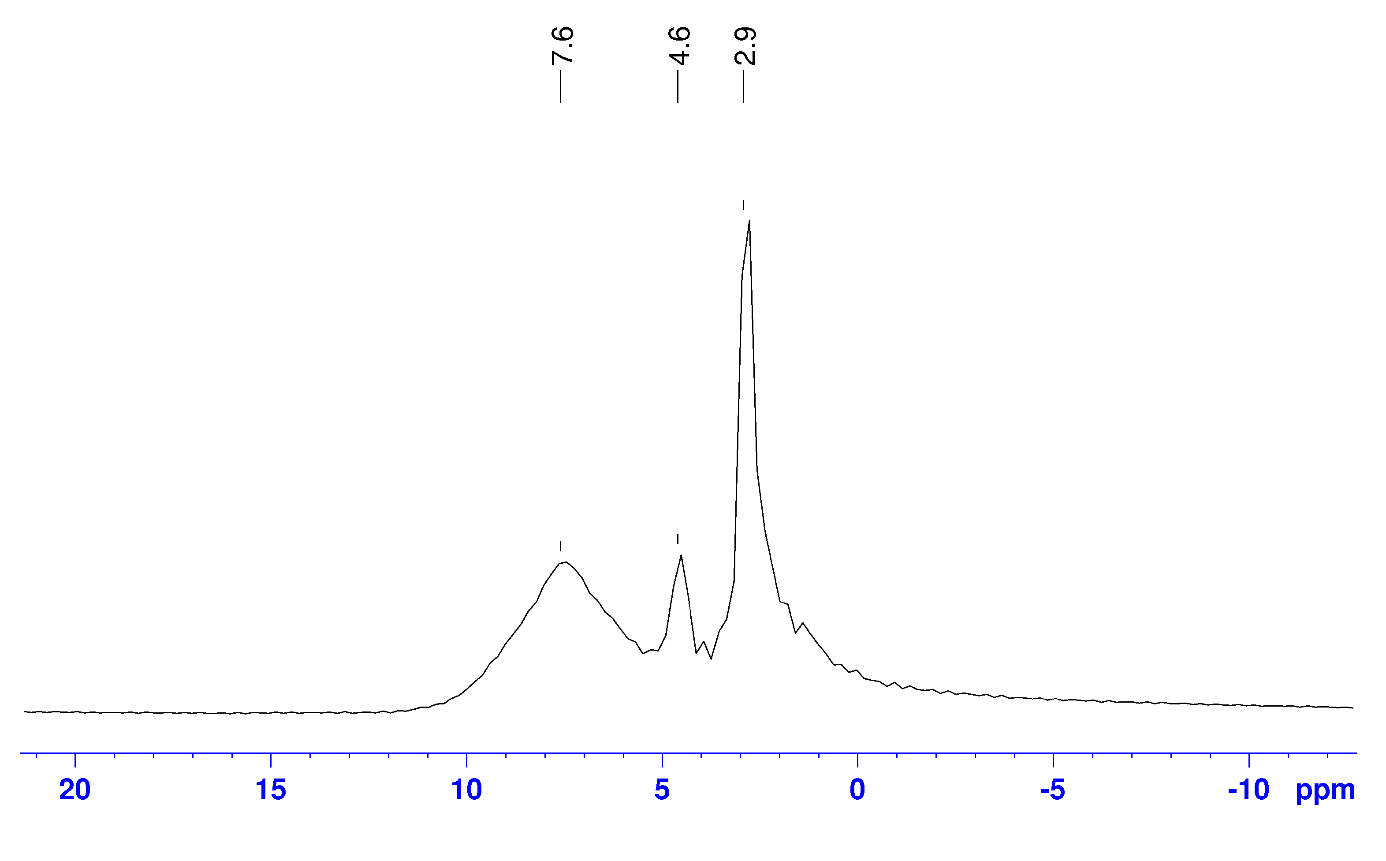
*

*Fig.S19 1H solid state NMR of Cu complex*

*
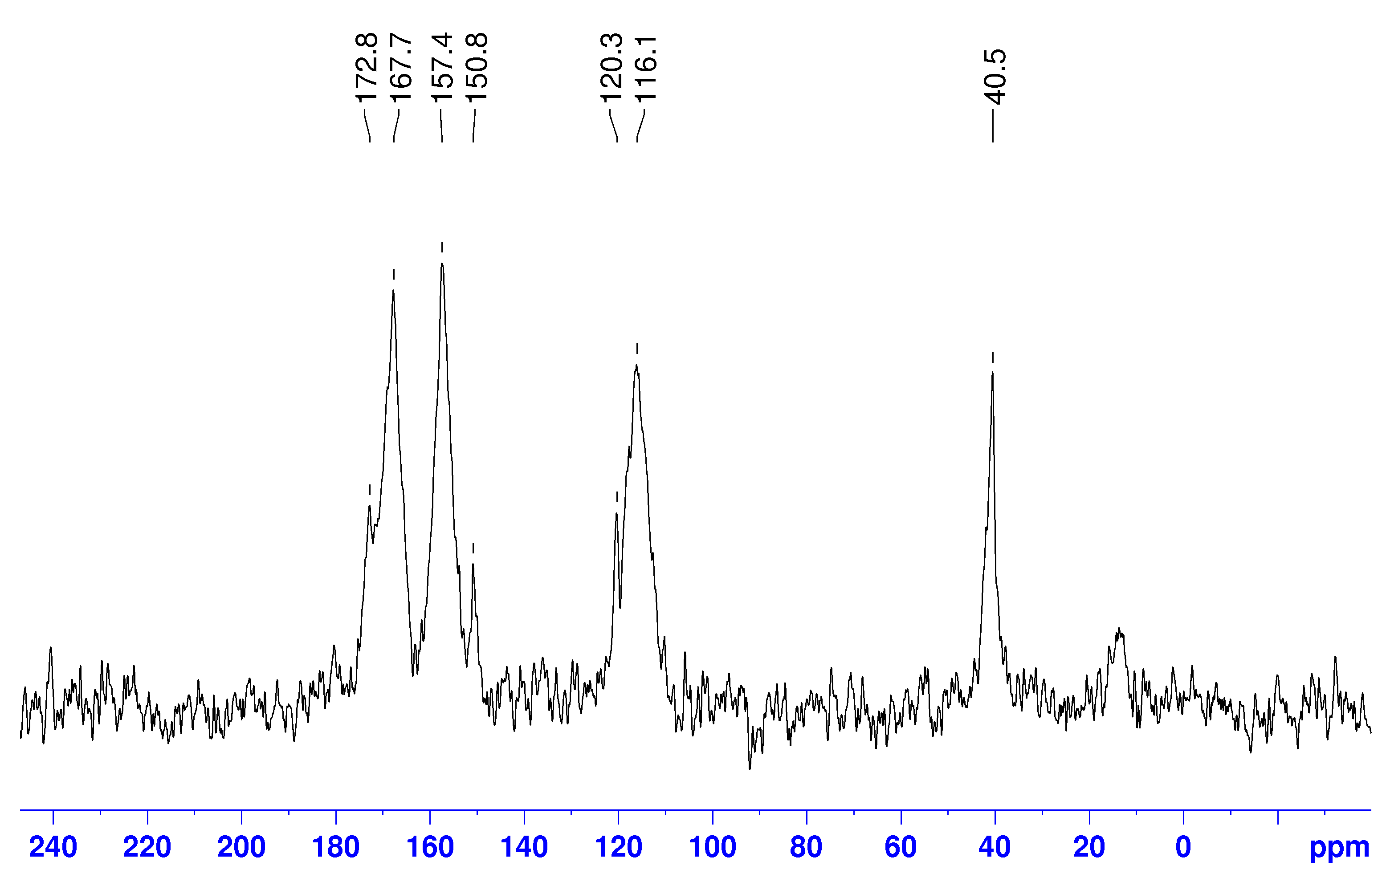
*

*Fig.S20 13C CP MAS NMR of Cu complex*

*
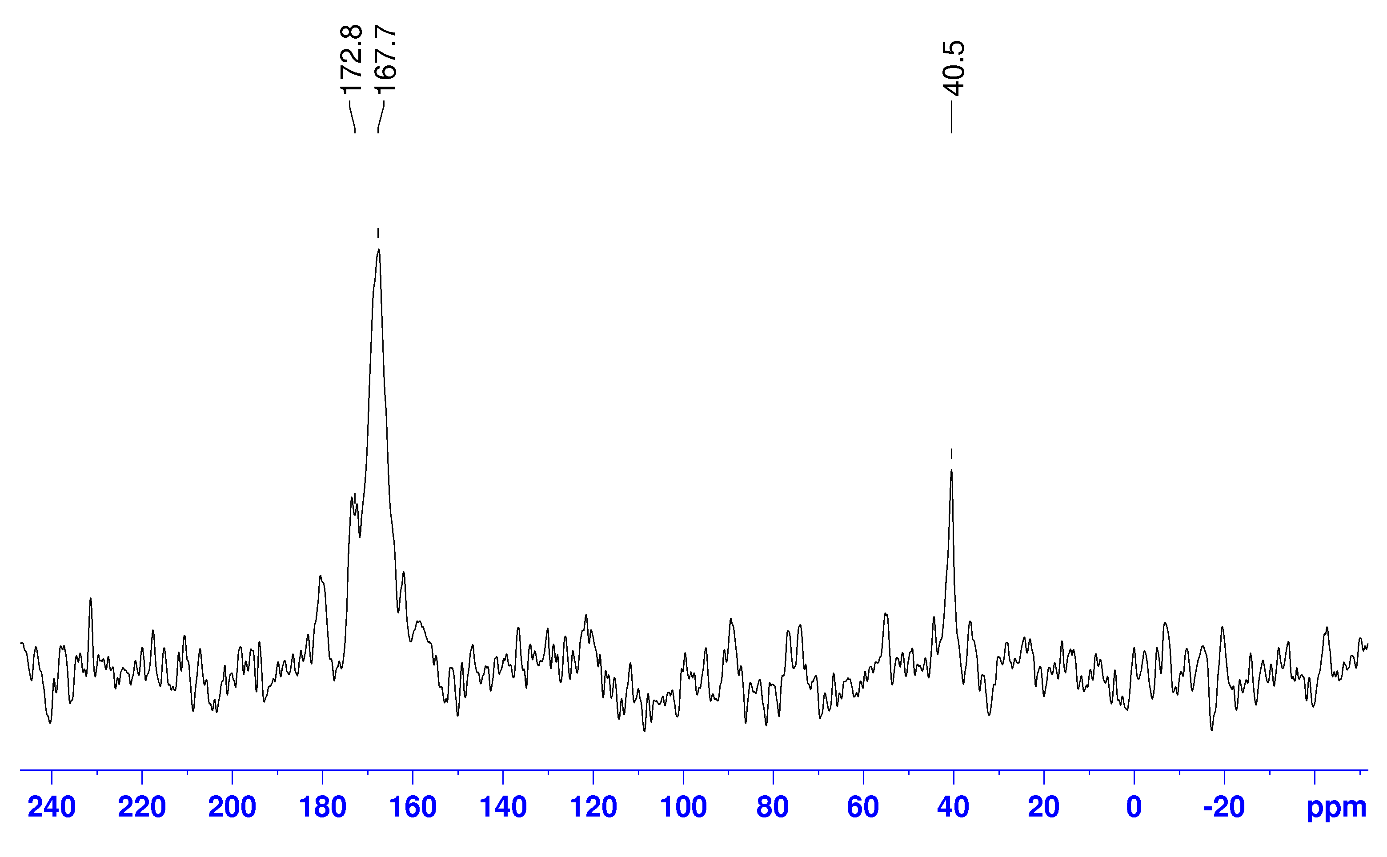
*

*Fig.S2113C CPPI MAS NMR of Cu complex*
